# Supplementary material for: Coordination polymer derived general synthesis of multi-shelled hollow metal oxides for lithium-ion batteries
Source: Royal Society of Chemistry journal article supplement (doi:10.1039/c9nr05220h), 2019-01-01
Supplement: c9nr05220h1.pdf [file c9nr05220h1.pdf]

**Supporting Information for**  
**Coordination Polymers Derived General Synthesis of Multi-shelled**  
**Hollow Metal Oxides for Lithium-ion Batteries**

Dongyang Xue,<sup>‡a</sup> Fangfang Xue,<sup>‡a</sup> Xiaoping Lin,<sup>a</sup> Fengyi Zong,<sup>a</sup> Jianmin Zhang<sup>a</sup> and

Qihong Li<sup>\*a</sup>

Pen-Tung Sah Institute of Micro-Nano Science and Technology, Xiamen University,

Xiamen 361005, China

E-mail: [liqihong@xmu.edu.cn](mailto:liqihong@xmu.edu.cn); Fax: +86-0592-2187196; Tel: +86-0592-2187198

## **Experimental details**

### **Synthesis of ZnCo<sub>2</sub>O<sub>4</sub> and other bimetallic oxides multi-shelled hollow spheres**

All chemicals and solvents were of analytical grade and purchased from commercial sources without further purification. In a typical synthesis process, 0.3 mmol Zn(NO<sub>3</sub>)<sub>2</sub>·6H<sub>2</sub>O, 0.6 mmol Co(NO<sub>3</sub>)<sub>2</sub>·6H<sub>2</sub>O and 0.9 mmol p-phthalic acid (PTA) were dissolved in a mixed solvent of DMF (30 mL) and glycerol (15 mL) to form a transparent pink solution by stirring for 2 h. Subsequently, the solution was transferred to a Teflon-lined stainless steel autoclave and kept at 150 °C for 6 h. After cooling to room temperature, pink precursor powders were obtained by centrifugation, and washed with ethanol and DMF for several times and dried at 80 °C for 24 h in an oven. Then the as-prepared Zn-Co coordination polymer (CPs) were annealed at 500 °C for 1 h in air with a heating rate of 1 °C min<sup>-1</sup> and multi-shelled ZnCo<sub>2</sub>O<sub>4</sub> hollow spheres were obtained. Other binary microsphere precursors were synthesized by the same method used for Zn-Co CPs and the atomic ratios of Mn/Co, Ni/Co and Ni/Mn were 1:2. During the synthesis process of ZnO-ZnCo<sub>2</sub>O<sub>4</sub> multi-shelled hollow spheres (MSHSs), the Zn/Co molar ratio was 1:1. Then the multi-shelled hollow binary metal oxides were obtained by the same annealing procedure as that for ZnCo<sub>2</sub>O<sub>4</sub> hollow spheres.

### **Synthesis of Co<sub>3</sub>O<sub>4</sub> multi-shelled hollow spheres**

0.6 mmol Co(NO<sub>3</sub>)<sub>2</sub>·6H<sub>2</sub>O and 0.6 mmol p-phthalic acid were dissolved in a mixed solvent of DMF (30 mL) and glycerol (15 mL) to form a transparent pink solution by stirring for 2 h. And then, the solution was transferred to a Teflon-lined

stainless steel autoclave and kept at 150 °C for 12 h. And the following synthesis steps were similar to those of ZnCo<sub>2</sub>O<sub>4</sub> multi-shelled hollow spheres.

### **Synthesis of Mn-Co-Zn, Ni-Co-Mn, Ni-Co-Zn oxides multi-shelled hollow spheres**

Using the synthesis process of Mn-Co-Zn oxides as an example, 0.3 mmol MnCl<sub>2</sub>·4H<sub>2</sub>O, 0.6 mmol Co(NO<sub>3</sub>)<sub>2</sub>·6H<sub>2</sub>O, 0.3 mmol Zn(NO<sub>3</sub>)<sub>2</sub>·6H<sub>2</sub>O and 1.2 mmol PTA were dissolved in a mixed solvent of DMF (30 mL) and glycerol (15 mL) to form a transparent pink solution by stirring for 2 h. Subsequently, the solution was transferred to a Teflon-lined stainless steel autoclave and kept at 150 °C for 8 h. The Ni-Co-Zn and Ni-Co-Mn microsphere precursors were obtained through similar procedures of synthesizing Mn-Co-Zn CPs by simply replacing 0.3 mmol Mn<sup>3+</sup> with 0.3 mmol Ni<sup>2+</sup>, or 0.3 mmol Zn<sup>3+</sup> with 0.3 mmol Ni<sup>2+</sup>, respectively. The multi-shelled hollow ternary metal oxides were generated via a similar thermal treatment of the corresponding precursors.

### **Materials Characterization**

The X-ray diffraction (XRD) patterns of the products were collected by using an X-ray diffractometer (Rigaku Ultima IV) with Cu-K<sub>α</sub> radiation at 35 kV and 25 mA in the scanning angle from 10° to 90°. Transmission electron microscopy (TEM; JEOL JEM-2100) and scanning electron microscope (SEM; ZEISS SUPRA 55) were used to characterize the morphology and structure of the samples. The elemental compositions of the samples were investigated by energy dispersive spectroscopy (EDS). Thermo-gravimetric analysis (TGA) was performed on a TG 209 F1 thermal

analyzer at a heating rate of  $10\text{ }^{\circ}\text{C min}^{-1}$  in a temperature range from room temperature to  $800\text{ }^{\circ}\text{C}$ . X-ray photoelectron spectroscopy (XPS, K-Alpha) was conducted to investigate the chemical compositions and element valence state of the samples. Fourier transform infrared spectroscopy (FTIR, Nicolet Avatar 330) was applied to investigate the information of functional group in the samples.

### **Electrochemical measurements**

The electrochemical performance of  $\text{ZnCo}_2\text{O}_4$  and  $\text{Co}_3\text{O}_4$  MSHSs were investigated by using CR2032 coin cells. The working electrode slurry was prepared by mixing 80 wt% active materials, 10 wt% acetylene black, 10 wt% sodium carboxymethyl cellulose and a certain amount of deionized water. After stirring evenly, the slurry was pasted onto the rough surface of a clean copper foil acting as current collector, followed by drying at  $85\text{ }^{\circ}\text{C}$  in a vacuum oven for 12 h. The mass loading of electrode was about  $0.8\text{-}1.0\text{ mg cm}^{-2}$ . The fresh coin cells were assembled in a glove box which was filled with argon using lithium foils as reference electrodes and Celgard 2400 as the separator membrane. The electrolyte were composed of 1 M  $\text{LiPF}_6$  in a compound of ethylene carbonate (EC), diethyl carbonate (DMC) (v/v = 1:1). Galvanostatic charge/discharge cycles were conducted by a battery tester (LAND CT2001A) within a voltage range from 0.01 to 3.00 V. A CHI 660E electrochemical workstation (Shanghai Chenhua Instrument Co., China) was applied to test the cyclic voltammogram (CV) at a scanning rate of  $0.1\text{ mVs}^{-1}$ .

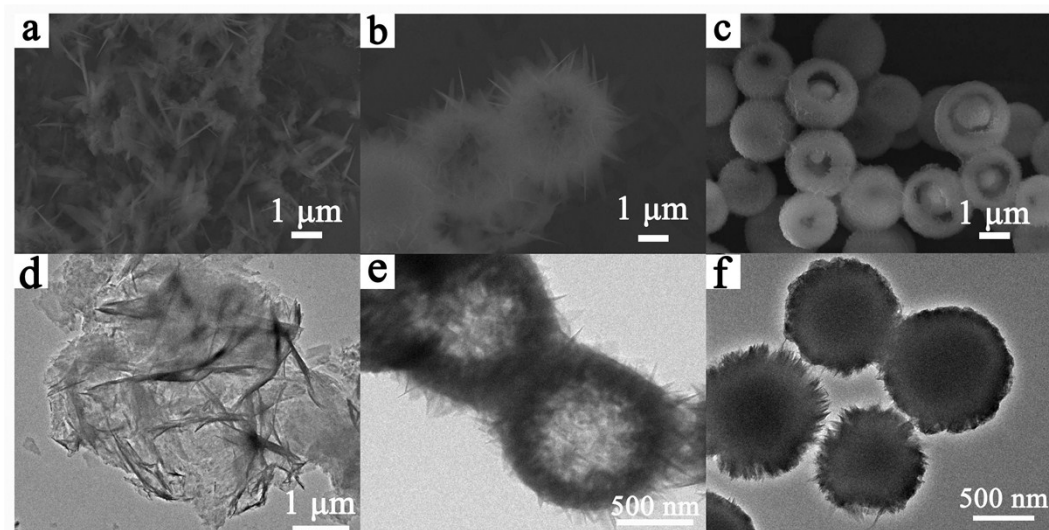

**Figure S1.** (a-c) SEM images and (d-f) TEM images of the precursors collected after (a, d) 0.5, (b, e) 1 and (c, f) 6 h of reaction.

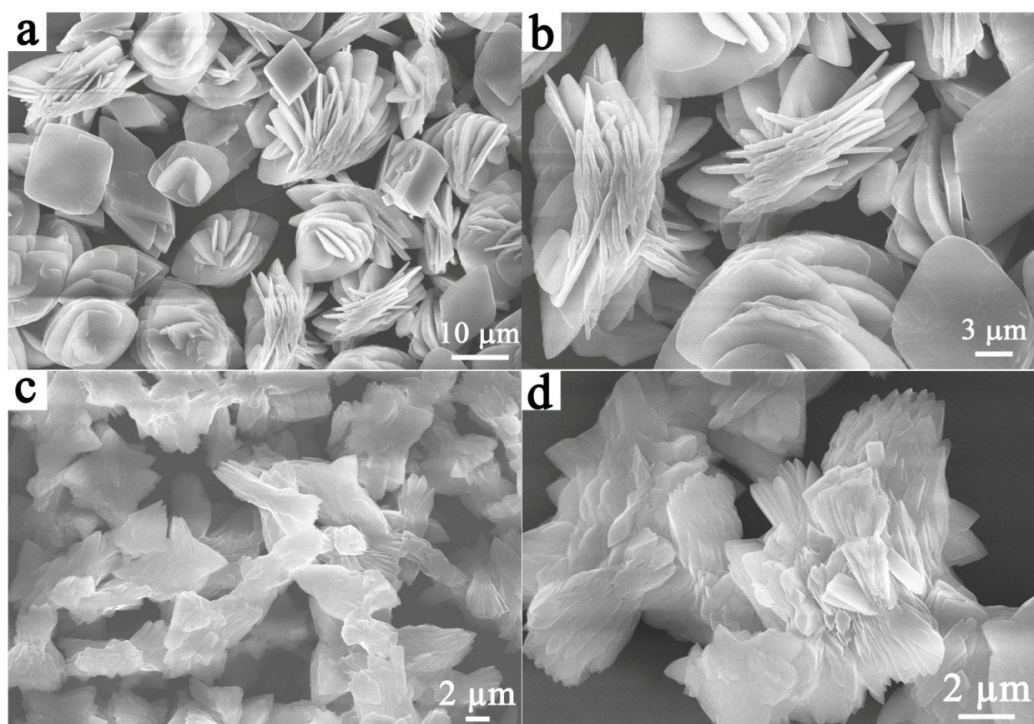

**Figure S2.** SEM images of the products prepared without PTA (a-b) or glycerol (c-d).

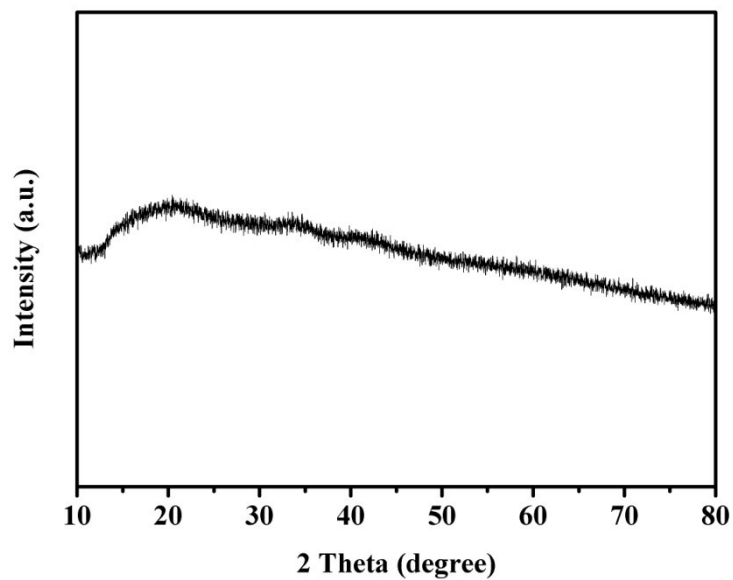

**Figure S3.** XRD pattern of Zn-Co CPs.

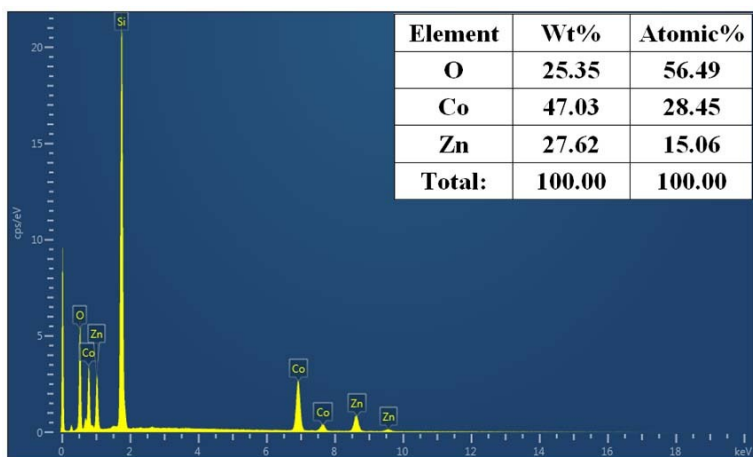

**Figure S4.** EDS spectrum of ZnCo<sub>2</sub>O<sub>4</sub> MSHSs.

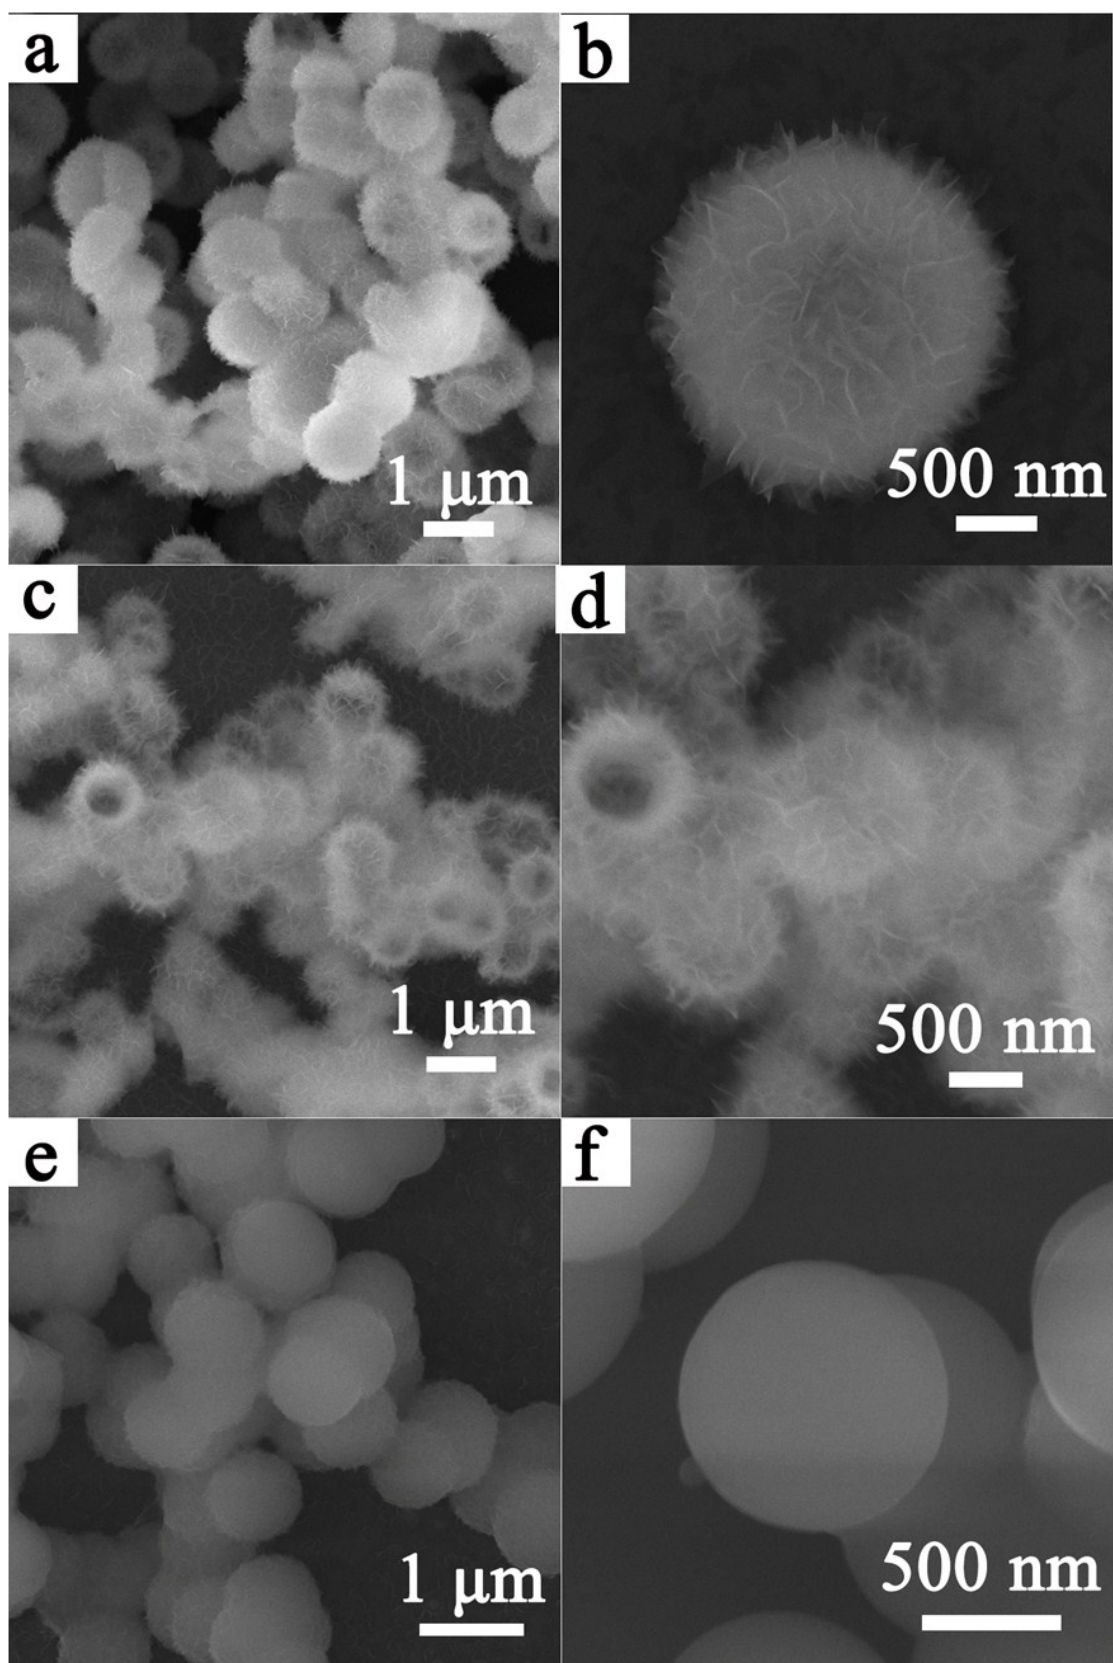

**Figure S5.** SEM images of (a-b) Mn-Co CPs, (c-d) Ni-Co CPs, and (e-f) Ni-Mn CPs at different magnifications.



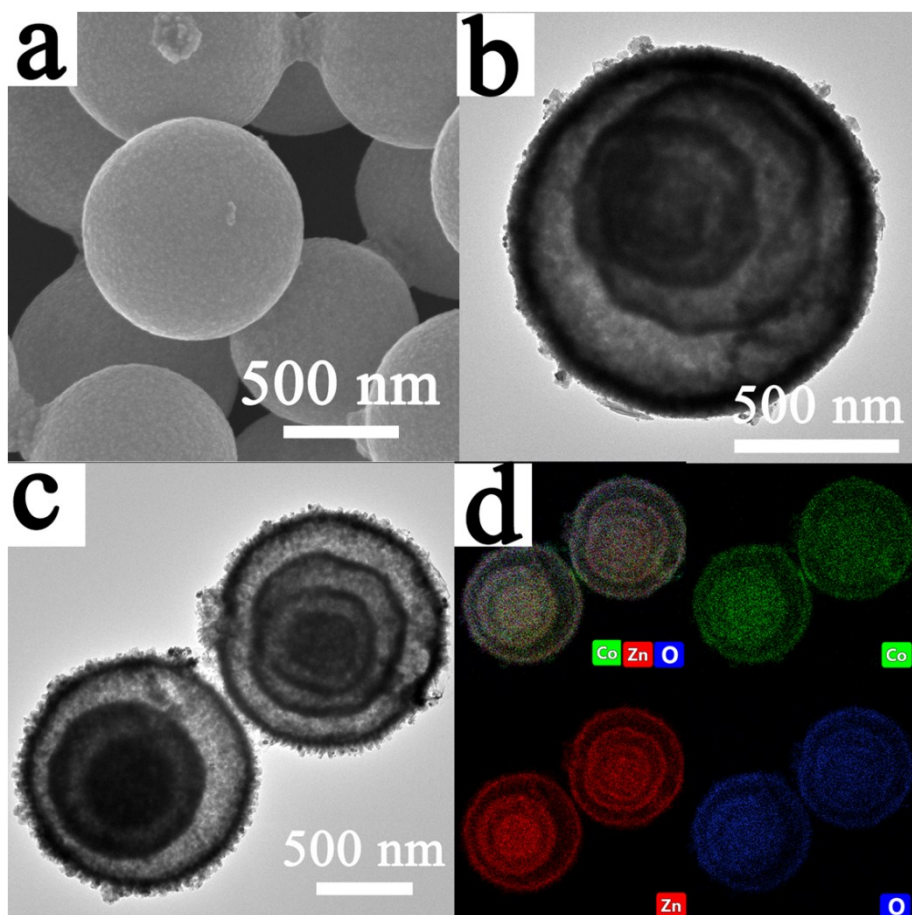

**Figure S6.** (a) SEM image and (b-c) TEM images of ZnO- ZnCo<sub>2</sub>O<sub>4</sub> MSHSs, (d) EDS mapping images of ZnO-ZnCo<sub>2</sub>O<sub>4</sub> MSHSs.



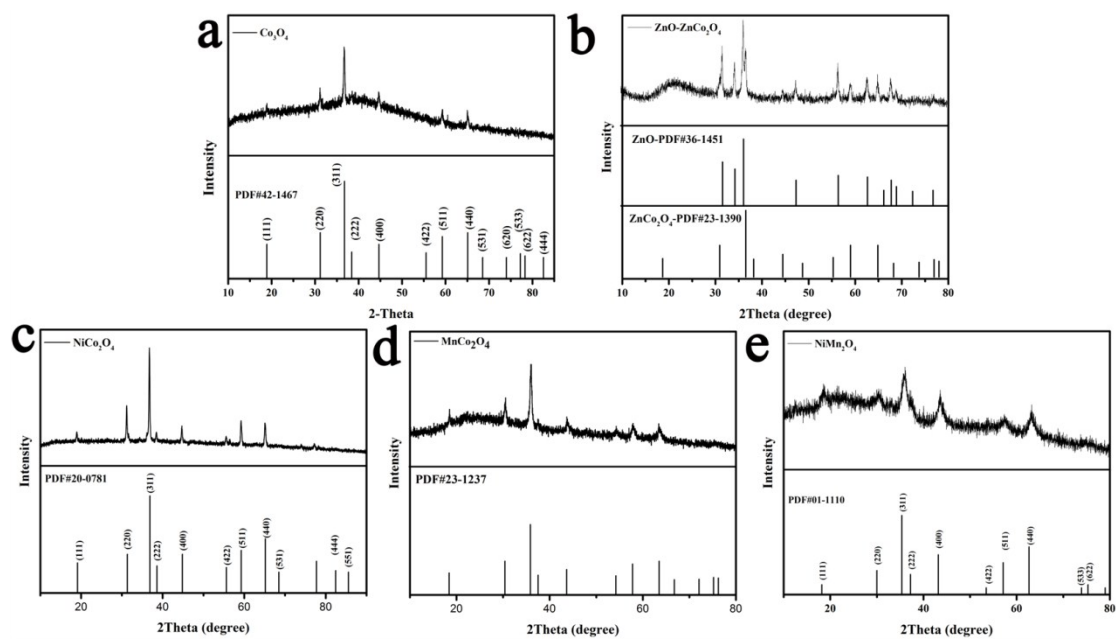

**Figure S7.** XRD patterns of as-prepared (a)  $\text{Co}_3\text{O}_4$ , (b)  $\text{ZnO-ZnCo}_2\text{O}_4$ , (c)  $\text{NiCo}_2\text{O}_4$ , (d)  $\text{MnCo}_2\text{O}_4$ , and (e)  $\text{NiMn}_2\text{O}_4$ .

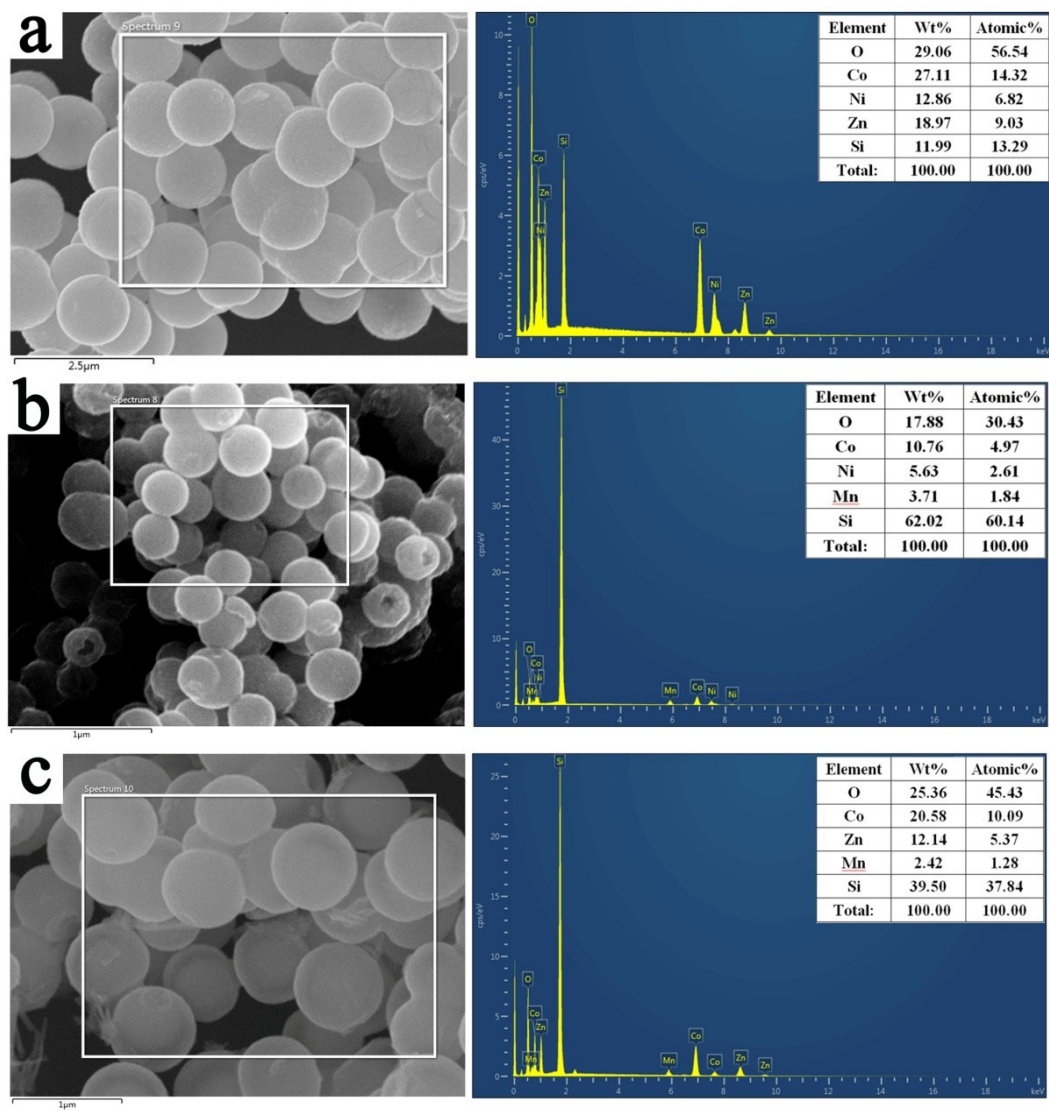

**Figure S8.** EDS results of (a) Ni-Co-Zn oxides, (b) Ni-Co-Mn oxides, and (c) Mn-Co-Zn oxides.

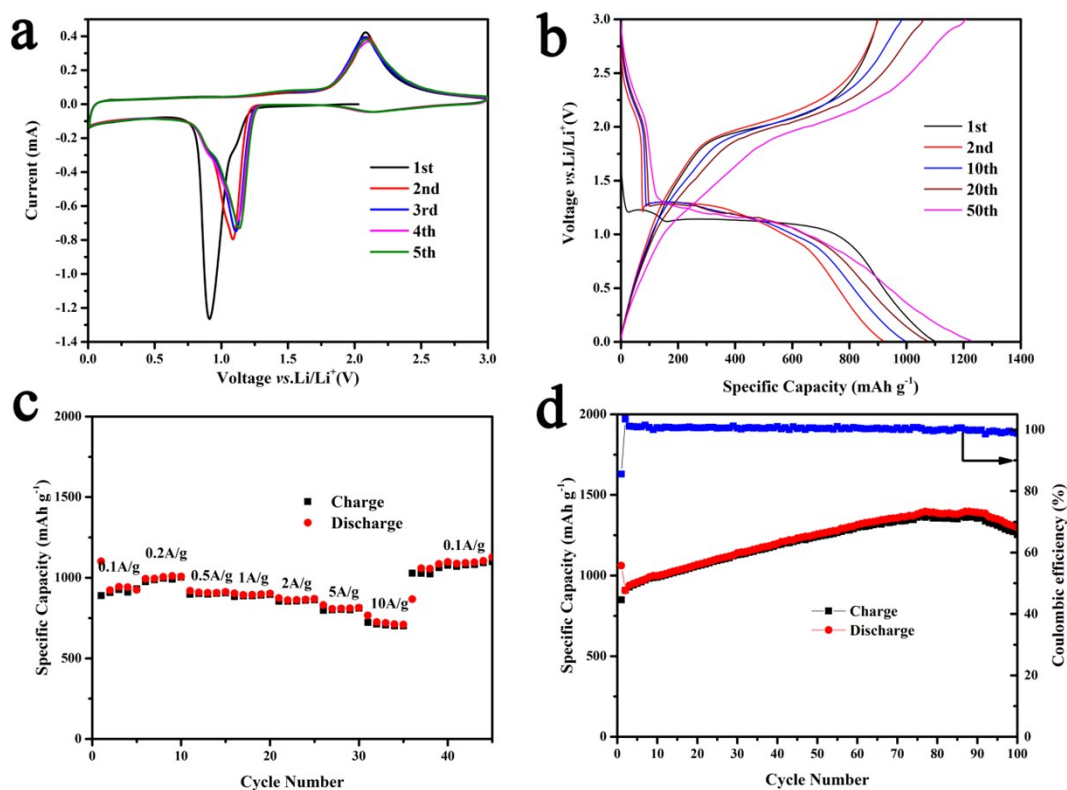

**Figure S9.** (a) CV curves of  $\text{Co}_3\text{O}_4$  MSHSs at a scan rate of  $0.1 \text{ mV s}^{-1}$  in a potential range from 0.01 to 3.0 V; (b) charge-discharge curves of  $\text{Co}_3\text{O}_4$  MSHSs at a current density of  $100 \text{ mA g}^{-1}$ ; (c) rate performance of  $\text{Co}_3\text{O}_4$  MSHSs; (d) cycling performance of  $\text{Co}_3\text{O}_4$  MSHSs at a current density of  $500 \text{ mA g}^{-1}$ .

Figure S9a illustrates the first five CV curves of  $\text{Co}_3\text{O}_4$  MSHSs anode in a voltage range from 0.01 to 3.0 V at a scanning rate of  $0.1 \text{ mV s}^{-1}$ . In the first cathodic scan, a distinct reduction peak located at 0.91 V is ascribed to the decomposition of  $\text{Co}_3\text{O}_4$  to metallic Co and the transition of Li to amorphous  $\text{Li}_2\text{O}$  together with the formation of SEI film<sup>1</sup>. In the first anodic scan, a distinct oxidation peak at 2.08 V corresponds to the oxidation of metallic Co to  $\text{Co}^{3+}$  accompanied with the decomposition of  $\text{Li}_2\text{O}$  to form lithium. In the subsequent cycles, the reduction peaks shift to 1.1 V together with sharply decreased intensity, indicating a different

electrochemical mechanisms from the first anodic process. Typical galvanostatic charge/discharge curves of  $\text{Co}_3\text{O}_4$  MSHSs anode at  $100 \text{ mA g}^{-1}$  are shown in Figure S9b. The discharge/charge curves of 2<sup>nd</sup>, 10<sup>th</sup>, 20<sup>th</sup>, 50<sup>th</sup> shift to the right gradually, indicating that the specific capacity of  $\text{Co}_3\text{O}_4$  MSHSs electrode increases gradually during the following lithium-storage process. The rate capabilities of  $\text{Co}_3\text{O}_4$  MSHSs anode is investigated under different current densities ranging from  $0.1$  to  $10 \text{ A g}^{-1}$  (Figure S9c). The  $\text{Co}_3\text{O}_4$  MSHSs electrode exhibits high reversible capacities of  $944$ ,  $1010$ ,  $906$ ,  $897$ ,  $869$ ,  $813$ ,  $720 \text{ mAh}\cdot\text{g}^{-1}$  at current densities of  $0.1$ ,  $0.2$ ,  $0.5$ ,  $1.0$ ,  $2.0$ , and  $5.0 \text{ A g}^{-1}$  respectively. Noticeably, when the current density is returned to  $0.1 \text{ A g}^{-1}$ , the specific capacity is reversibly back to  $1100 \text{ mAh}\cdot\text{g}^{-1}$  after 10 cycles. The results suggests that  $\text{Co}_3\text{O}_4$  MSHSs maintain extraordinary structural stability even under high current density. Obviously, the discharge capacity ( $1010 \text{ mAh}\cdot\text{g}^{-1}$ ) at  $0.2 \text{ A g}^{-1}$  is even higher than that at  $0.1 \text{ A g}^{-1}$ , which is probably caused by the gradual active process of multi-shell structures and transition metal oxides<sup>2</sup>. Furthermore, the  $\text{Co}_3\text{O}_4$  MSHSs electrode shows excellent cyclic stability at a current density of  $500 \text{ mA g}^{-1}$ . Apparently, the capacity of  $\text{Co}_3\text{O}_4$  MSHSs increases from initial  $849$  to  $1380 \text{ mAh}\cdot\text{g}^{-1}$  and still retains the capacity of  $1300 \text{ mAh}\cdot\text{g}^{-1}$  after 100 cycles. This results illustrated that  $\text{Co}_3\text{O}_4$  MSHSs possess similar superior electrochemical performance as  $\text{ZnCo}_2\text{O}_4$  MSHSs.

**Table S1 Electrochemical performance of different Zn-Co based electrodes.**

| Type of materials                                                   | Cycling performance                                                  | Rate capability                                      | Ref.      |
|---------------------------------------------------------------------|----------------------------------------------------------------------|------------------------------------------------------|-----------|
| rGO/ZnCo <sub>2</sub> O <sub>4</sub> nanocomposite                  | 960.8 mA h g <sup>-1</sup> after 100 cycles at 90 mA g <sup>-1</sup> | 593.2 mA h g <sup>-1</sup> at 900 mA g <sup>-1</sup> | [3]       |
| ZnCo <sub>2</sub> O <sub>4</sub> nanoparticles                      | 770 mAh g <sup>-1</sup> after 50 cycles at 60 mA g <sup>-1</sup>     | ~430 mAh g <sup>-1</sup> at 240 mA g <sup>-1</sup>   | [4]       |
| ZnCo <sub>2</sub> O <sub>4</sub> yolk-shelled microspheres          | 331 mA h g <sup>-1</sup> after 500 cycles at 1000 mA g <sup>-1</sup> | 553 mA h g <sup>-1</sup> at 2000 mA g <sup>-1</sup>  | [5]       |
| Double-shelled ZnCo <sub>2</sub> O <sub>4</sub> hollow microspheres | 1019 mAh g <sup>-1</sup> after 120 cycles at 90 mA g <sup>-1</sup>   | 570 mA h g <sup>-1</sup> at 4500 mA g <sup>-1</sup>  | [6]       |
| Mesoporous ZnCo <sub>2</sub> O <sub>4</sub> microsphere             | 721 mAh g <sup>-1</sup> after 80 cycles at 0.1 A g <sup>-1</sup>     | 435 mA h g <sup>-1</sup> at 2 A g <sup>-1</sup>      | [7]       |
| Multi-shelled hollow ZnCo <sub>2</sub> O <sub>4</sub> sphere        | 1300 mA h g <sup>-1</sup> after 200 cycles at 100 mA g <sup>-1</sup> | 450 mA h g <sup>-1</sup> at 10 A g <sup>-1</sup>     | This work |

## References

- [1] Y. G. Li, B. Tan and Y. Y. Wu, *Nano Letters*, 2008, 8, 265-270.
- [2] J. Bai , X. G. Li , G. Z. Liu , Y. T. Qian , and S. L. Xiong, *Adv. Funct. Mater.* 2014, 24, 3012–3020
- [3] G. X. Gao , H. B. Wu , B. T. Dong , S. J. Ding , and X. W. (David) Lou, *Adv. Sci.*, 2015, 2, 1400014.

- [4] D. Deng and J. Y. Lee, *Nanotechnology*, 2011, **22**, 355401.
- [5] J. F. Li, J. Z. Wang, D. Wexler, D. Q. Shi, J. W. Liang, H. K. Liu, S. L. Xiong and Y. T. Qian, *J. Mater. Chem. A*, 2013, **1**, 15292–15299.
- [6] Q. S. Xie, F. Li, H. Z. Guo, L. S. Wang, Y. Z. Chen, G. H. Yue, and D. L. Peng, *ACS Appl. Mater. Interfaces*, 2013, **5**, 5508-5517.
- [7] L. L. Hu, B. H. Qu, C. C. Li, Y. J. Chen, L. Mei, D. N. Lei, L. B. Chen, Q. H. Li and T. H. Wang, *J. Mater. Chem. A*, 2013, **1**, 5596–5602.
